# Supplementary material for: Hierarchical core/shell structures of ZnO nanorod@CoMoO4 nanoplates used as a high-performance electrode for supercapacitors
Source: Royal Society of Chemistry journal article supplement (doi:10.1039/c5ra21953a), 2015-12-23
Supplement: c5ra21953a1.pdf [file c5ra21953a1.pdf]

## Electronic Supplementary Information

### Hierarchical Core/Shell Structures of ZnO Nanorod@CoMoO<sub>4</sub> Nanoplates Used as a High- Performance Electrode for Supercapacitors

Yunjiu Cao,<sup>ab</sup> Lei An,<sup>a</sup> Lijun Liao,<sup>a</sup> Xijian Liu,<sup>ab</sup> Tao Ji,<sup>ab</sup> Rujia Zou,<sup>a</sup> Jianmao Yang,<sup>\*a</sup>  
Zongyi Qin<sup>\*a</sup> and Junqing Hu<sup>\*a</sup>

<sup>a</sup>State Key Laboratory for Modification of Chemical Fibers and Polymer Materials,  
College of Materials Science and Engineering, Donghua University, Shanghai 201620,  
China

<sup>b</sup>School of Fundamental Studies, Shanghai University of Engineering Science,  
Shanghai 201620, China

E-mail: [yangjm@dhu.edu.cn](mailto:yangjm@dhu.edu.cn); [phqin@dhu.edu.cn](mailto:phqin@dhu.edu.cn); [hu.junqing@dhu.edu.cn](mailto:hu.junqing@dhu.edu.cn)

## Supplementary Figures

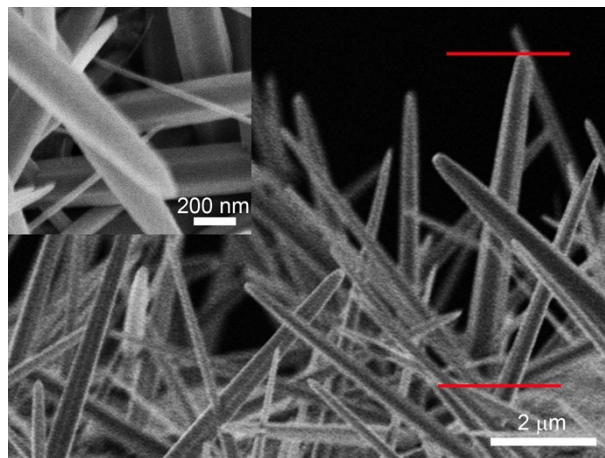

**Fig. S1** SEM image of the as-synthesized ZnO nanorods.

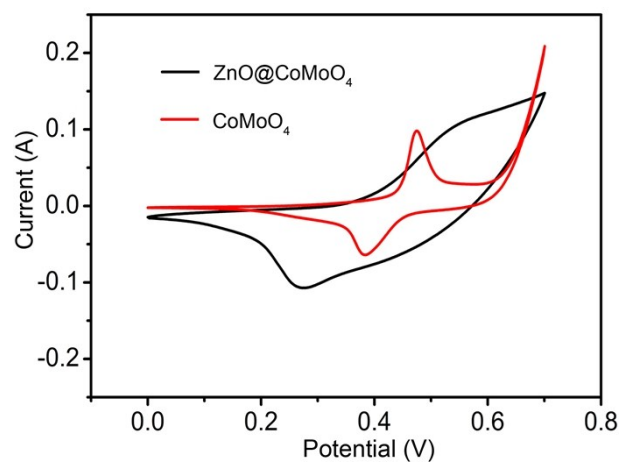

**Fig.S2** CV curves of the ZnO@CoMoO<sub>4</sub> core/shell structure and pure CoMoO<sub>4</sub> electrodes at scan rate of 50 mV s<sup>-1</sup>.

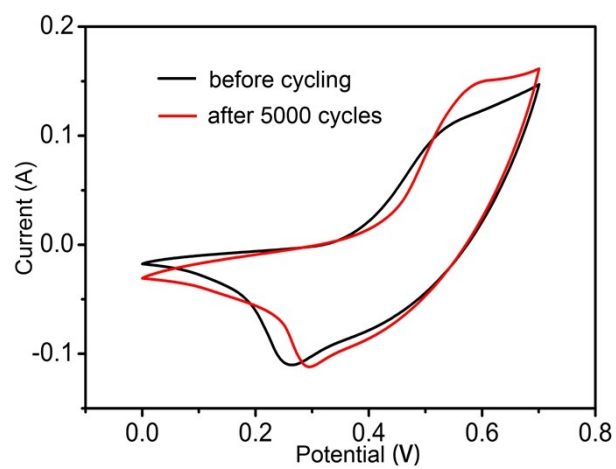

**Fig.S3** CV curves of the ZnO@CoMoO<sub>4</sub> core/shell structures (on Ni foam) electrode at a scan rate of 50 mV s<sup>-1</sup> before and after cycling.
